# Supplementary material
Source: PubMed Central journal article supplement (PMC3744824)
Supplement: NIHMS495026-supplement-01.pdf [file NIHMS495026-supplement-01.pdf]

**Supplementary Table 1: Characteristics of patients with indicated preterm delivery (<37 weeks) and *Non- Angiogenic preeclampsia* (S/P ratio <85)**

| #ID | S/P ratio | GA triage (wks) | GA delivery (wks) | Highest BP (mmHg) |     | Highest LFT's (U/L) |     | Lowest PLT (K/uL) | Urine protein-mg (24-hour protein) | Outcome                | Diagnosis       | Clinical                                                                                        |
|-----|-----------|-----------------|-------------------|-------------------|-----|---------------------|-----|-------------------|------------------------------------|------------------------|-----------------|-------------------------------------------------------------------------------------------------|
|     |           |                 |                   | SBP               | DBP | AST                 | ALT |                   |                                    |                        |                 |                                                                                                 |
| 146 | 25.7      | 35.5            | 36.1              | 164               | 98  | 15                  | N/A | 164               | 325                                | Delivery<br>Severe HTN | Superimposed PE | CHTN                                                                                            |
| 213 | 55.3      | 34.4            | 35.5              | 172               | 113 | 21                  | 33  | 188               | N/A                                | Delivery<br>Severe HTN | Severe PE       | Diagnosis based on BP, P/C ratio= 1.4                                                           |
| 303 | 3.1       | 33.4            | 35.1              | 160               | 100 | 9                   | N/A | 263               | 300                                | Delivery               | Severe PE       | Diagnosis based on Headache and HTN. Indication for delivery-Headache                           |
| 305 | 58.2      | 33.4            | 34.1              | 150               | 100 | 22                  | N/A | 194               | 417                                | Delivery               | Severe PE       | Diagnosis based on Headache and HTN. Indication for delivery-Headache                           |
| 310 | 52.1      | 36.5            | 36.5              | 144               | 100 | 15                  | 21  | 173               | N/A                                | Delivery               | Mild PE         | P/C ratio 0.7. Indication for delivery-Elective                                                 |
| 336 | 78.1      | 34.3            | 35.4              | 151               | 93  | 23                  | 16  | 223               | 609                                | Delivery               | Mild PE         | Indication for delivery-Elective                                                                |
| 361 | 46.6      | 35.4            | 36.4              | 140               | 82  | 21                  | 26  | 185               | 460                                | Delivery               | Mild PE         | Indication for delivery-Elective                                                                |
| 378 | 77.5      | 36.4            | 36.5              | 182               | 99  | 14                  | N/A | 257               | N/A                                | Delivery<br>Severe HTN | Severe PE       | Diagnosis based on HTN and headache. CHTN, P/C ratio= 0.4 Indication for delivery-Headache, HTN |
| 399 | 1.4       | 31.1            | 32.5              | 140               | 74  | 139                 | 87  | 348               | 522                                | Delivery               | AFLP            | Indication for delivery- AFLP                                                                   |
| 413 | 11.1      | 35.3            | 36.4              | 140               | 90  | 18                  | 19  | 254               | 475                                | Delivery               | Superimposed PE | CHTN, Morbid obesity. Indication for delivery-Elective                                          |
| 458 | 5.0       | 29.2            | 29.2              | 160               | 100 | 42                  | 46  | 383               | 500                                | Delivery               | Severe PE       | Diagnosis based on                                                                              |

|     |      |      |      |     |     |    |    |     |      |                        |                    |  |                                                                                                   |
|-----|------|------|------|-----|-----|----|----|-----|------|------------------------|--------------------|--|---------------------------------------------------------------------------------------------------|
|     |      |      |      |     |     |    |    |     |      |                        |                    |  | Headache and HTN.<br>Indication for delivery-<br>Headache                                         |
| 575 | 55.5 | 35.2 | 35.2 | 160 | 103 | 19 | 18 | 216 | N/A  | Delivery               | Severe PE          |  | Diagnosis based on<br>Headache and HTN. P/C<br>ratio= 1.2<br>Indication for delivery-<br>Headache |
| 598 | 1.0  | 32.0 | 32.4 | 180 | 100 | 19 | 17 | 249 | 1102 | Delivery               | Superimposed<br>PE |  | CHTN, Indication for<br>delivery- Headache                                                        |
| 612 | 40.5 | 32.3 | 33.1 | 170 | 100 | 18 | 43 | 257 | 1553 | Delivery<br>Severe HTN | Severe PE          |  | Diagnosis based on<br>Headache and HTN.<br>Indication for delivery-<br>Headache                   |
| 630 | 70.1 | 36.5 | 36.6 | 149 | 94  | 9  | 11 | 261 | N/A  | Delivery               | Mild PE            |  | P/C ratio= 4.3,<br>Indication for delivery-<br>Elective                                           |
| 642 | 17.9 | 34.5 | 36.2 | 166 | 106 | 29 | 34 | 173 | 458  | Delivery               | Superimposed<br>PE |  | CHTN, Type I Diabetes<br>Mellitus, Nephropathy.<br>Indication for delivery-<br>Elective           |
| 749 | 9.9  | 34.4 | 36.1 | 169 | 106 | 15 | 17 | 207 | 304  | Delivery<br>Severe HTN | Severe PE          |  | Indication for delivery-<br>Elevated BP                                                           |

All data collected within 2 weeks of triage visit and measurement of S/P ratio. N/A= not available.

PE= preeclampsia , S/P= sFlt1/PIGF ratio , AST= Asparate Aminotransferase, ALT= Alanine Aminotransferase, PLT= platelet count, S/P= sFlt1/PIGF ratio, GA= gestational age, BP= blood pressure, SBP= systolic Blood pressure, DBP= diastolic blood pressure, LFT's= Liver function tests, P/C= protein creatinine ratio, HTN= hypertension, AFLP= acute fatty liver of pregnancy
